# Supplementary material for: RZA-NLMF algorithm-based adaptive sparse sensing for realizing compressive sensing
Source: Springer Nature journal article supplement (doi:10.1186/1687-6180-2014-125), 2014-08-09

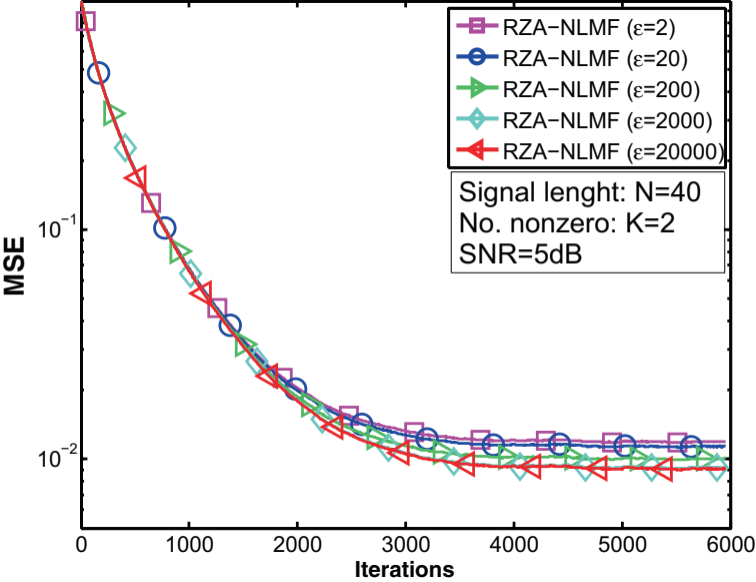

Supplement: 13634_2014_746_MOESM4_ESM.pdf [file 13634_2014_746_MOESM4_ESM.pdf]
